# Supplementary material for: SUMO1‐conjugation is altered during normal aging but not by increased amyloid burden
Source: PubMed Central journal article supplement (PMC6052395; doi:10.1111/acel.12760), 2018-04-06

# Hippocampal Loading I

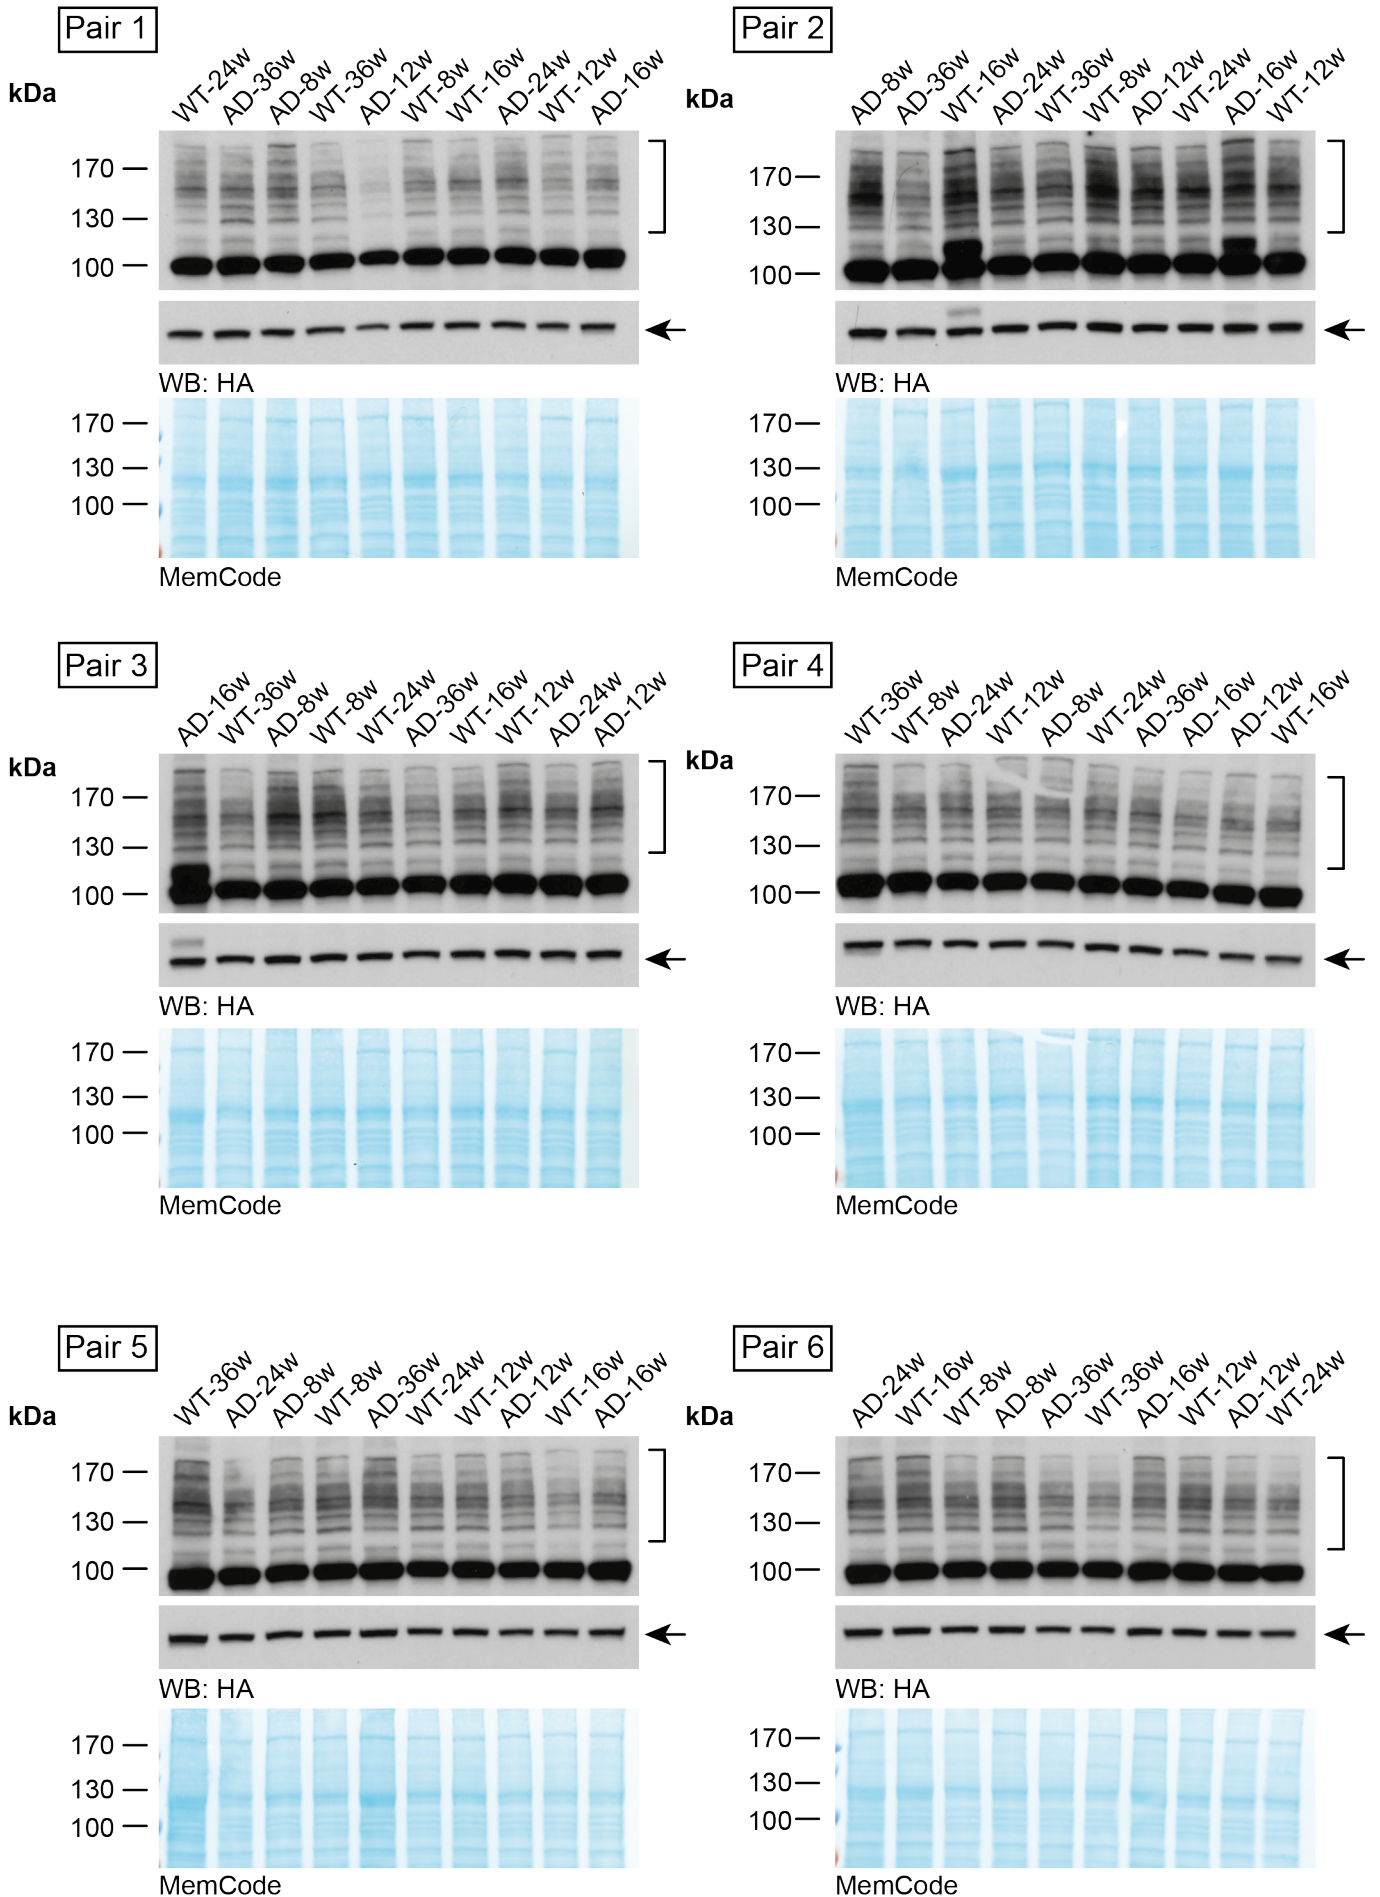

# Hippocampal Loading II

Pair 1

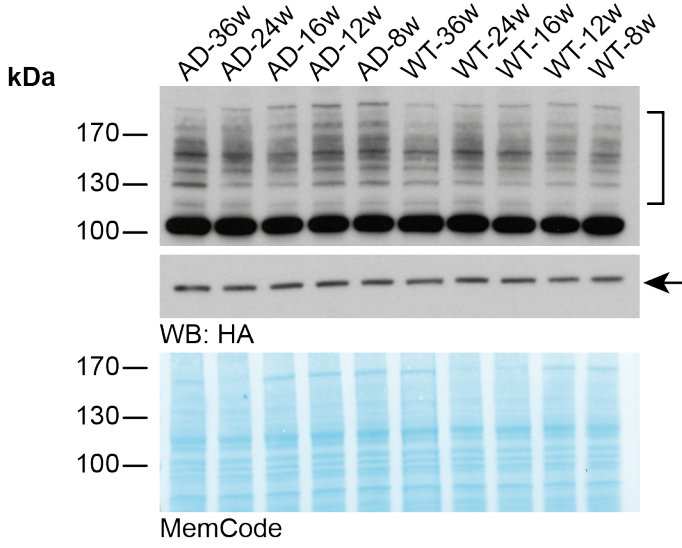

Pair 2

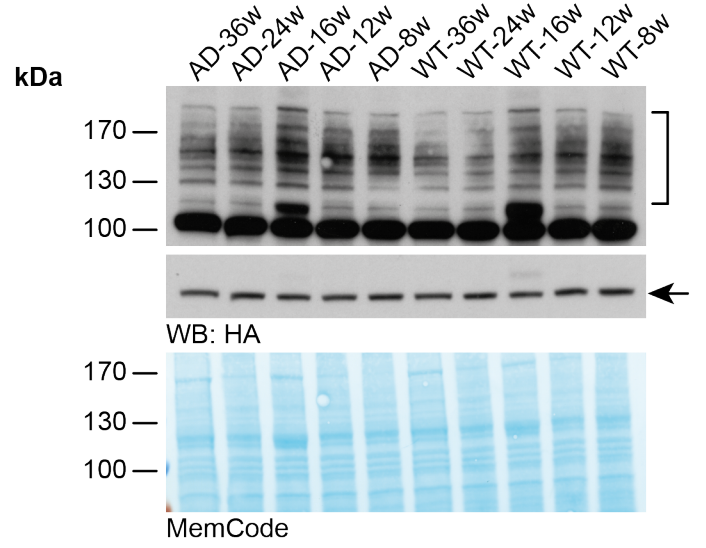

Pair 3

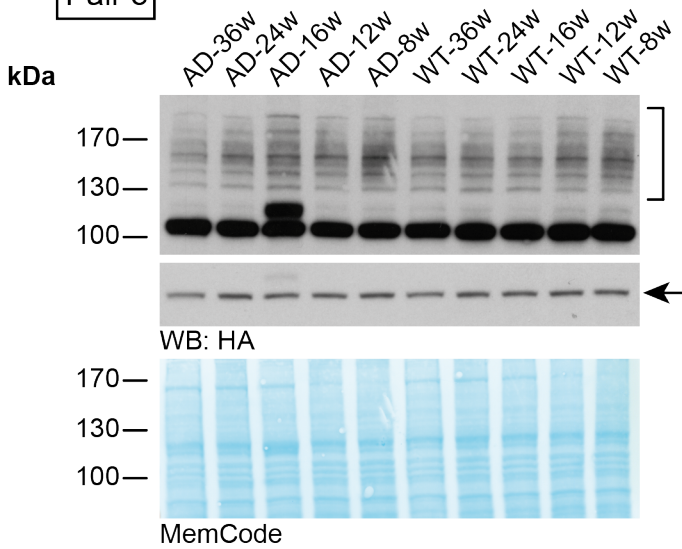

Pair 4

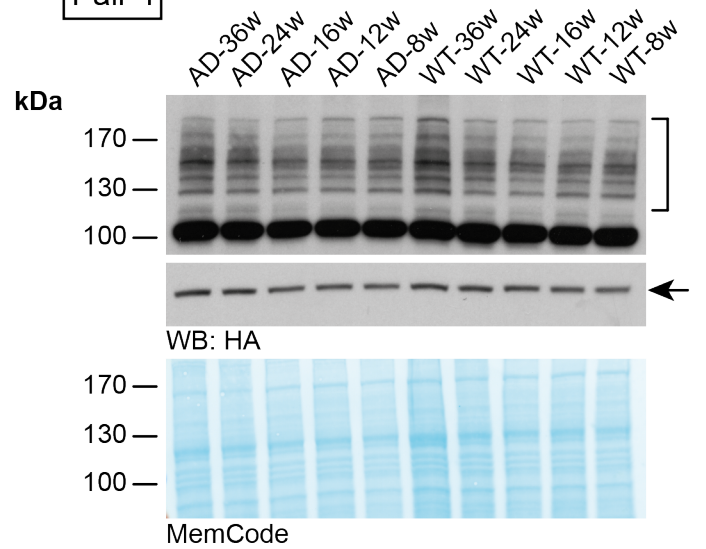

Pair 5

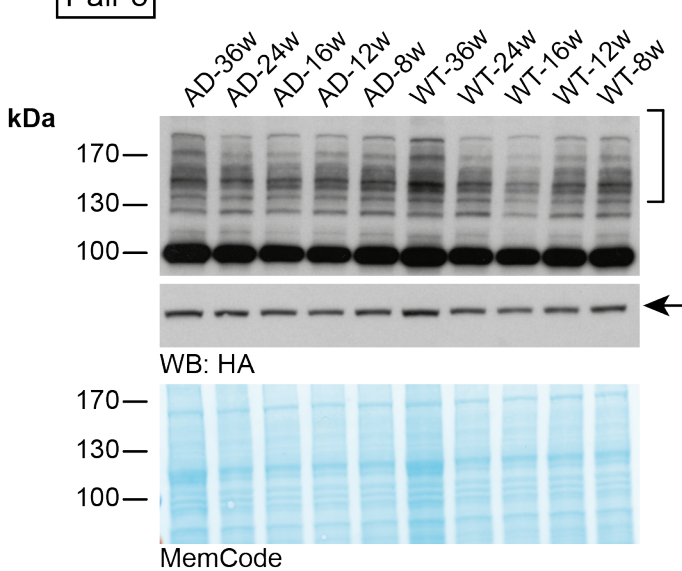

Pair 6

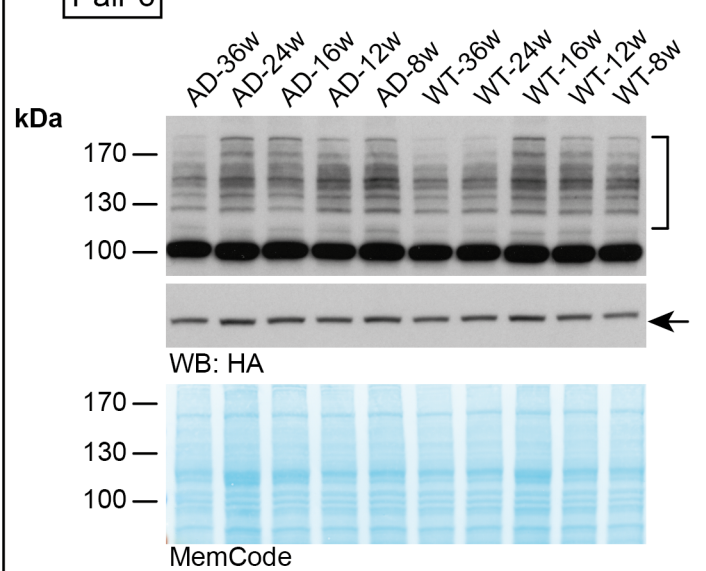

# Hippocampal Loading III

Pair 1

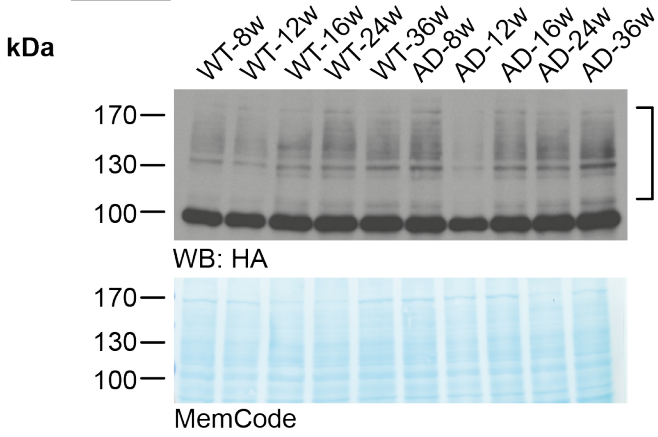

Pair 2

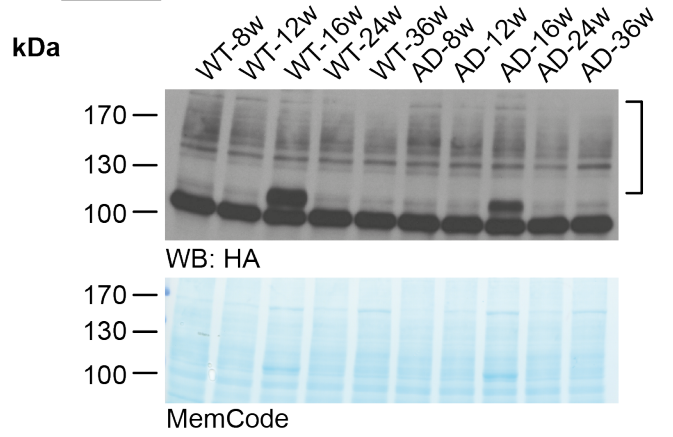

Pair 3

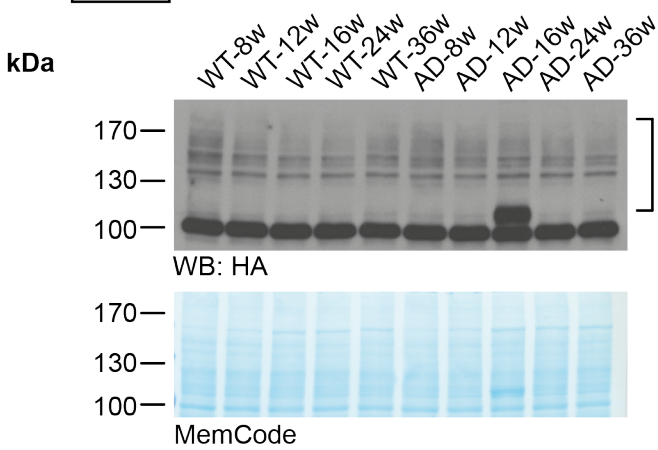

Pair 4

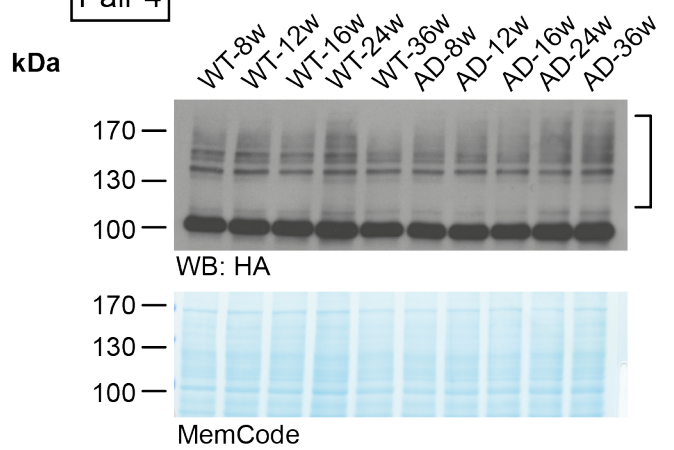

Pair 5

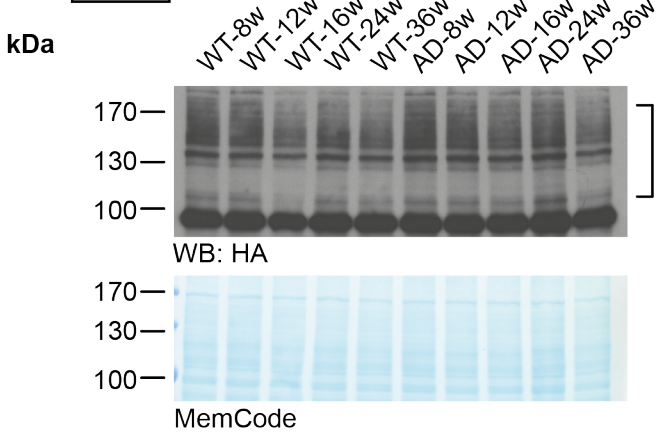

Pair 6

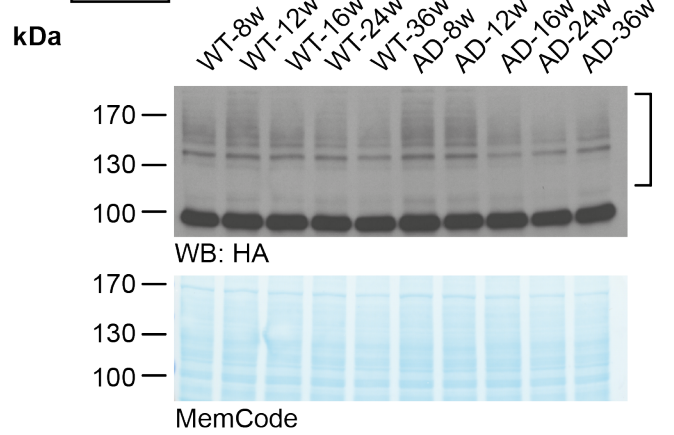

# Cortical Loading I

Pair 1

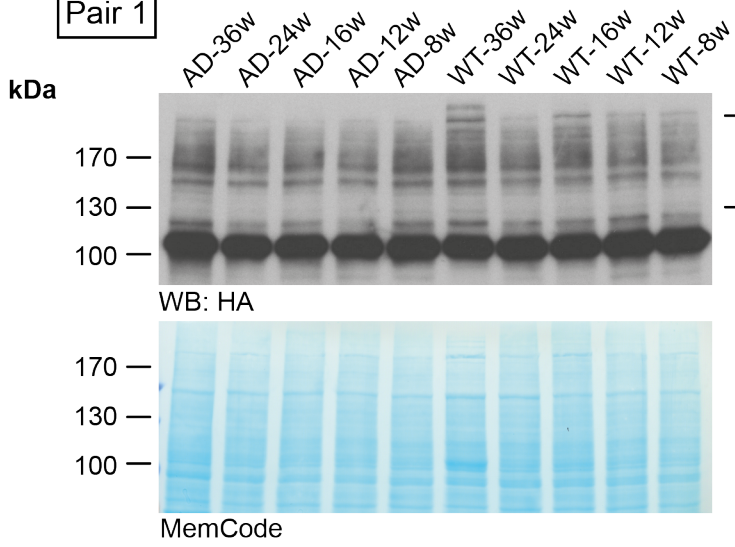

Pair 2

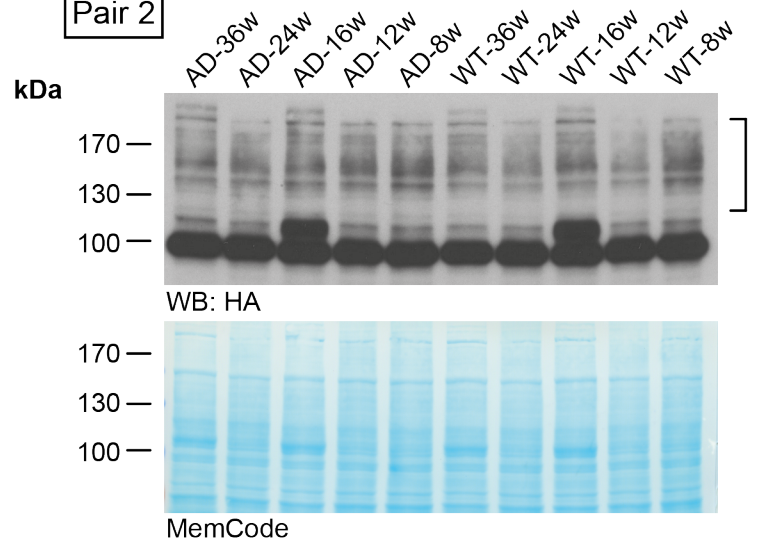

Pair 3

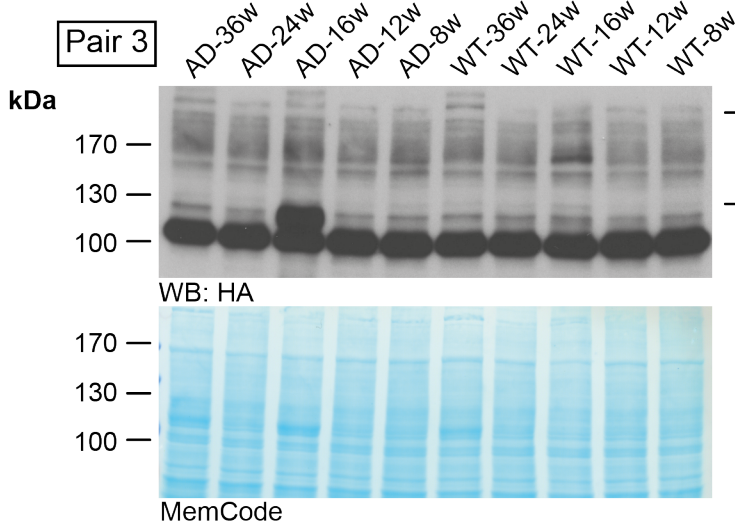

Pair 4

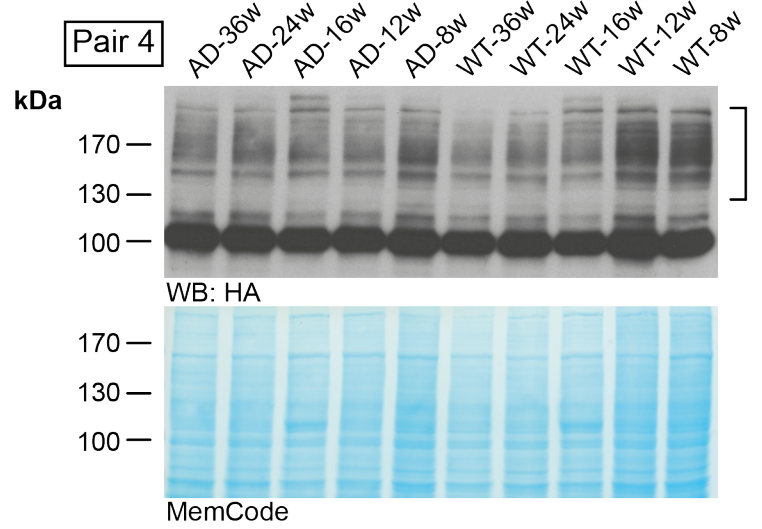

Pair 5

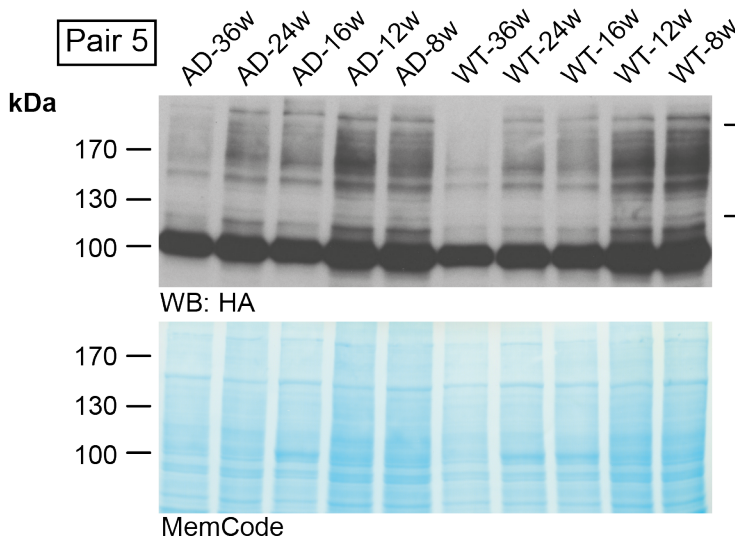

Pair 6

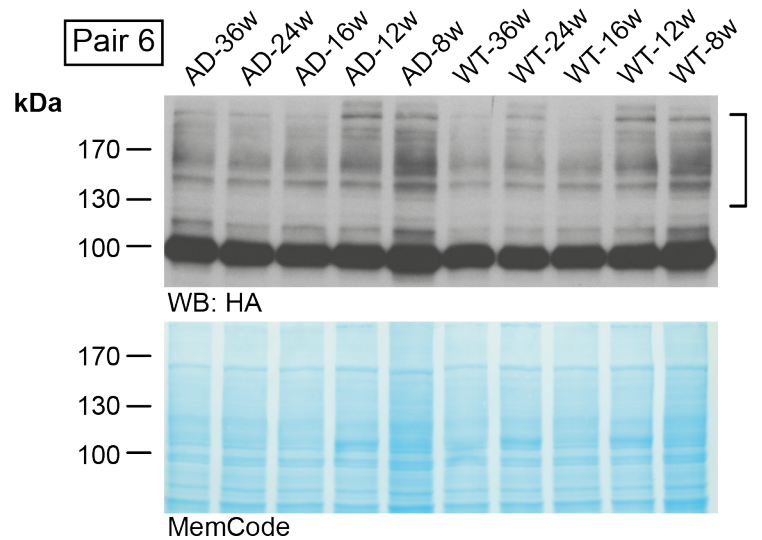

## Cortical Loading II

**Pair 1**

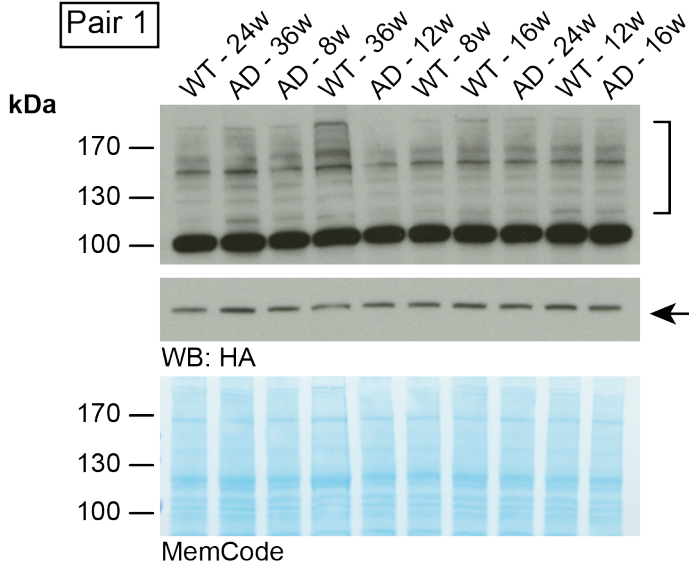

**Pair 2**

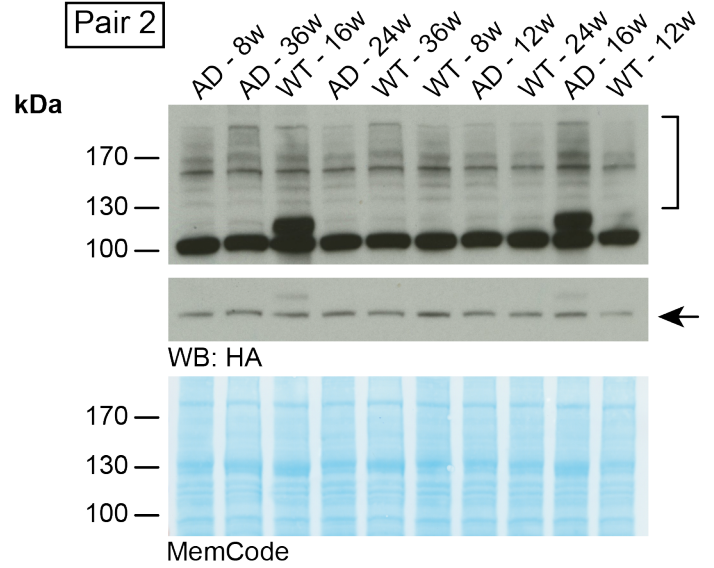

**Pair 3**

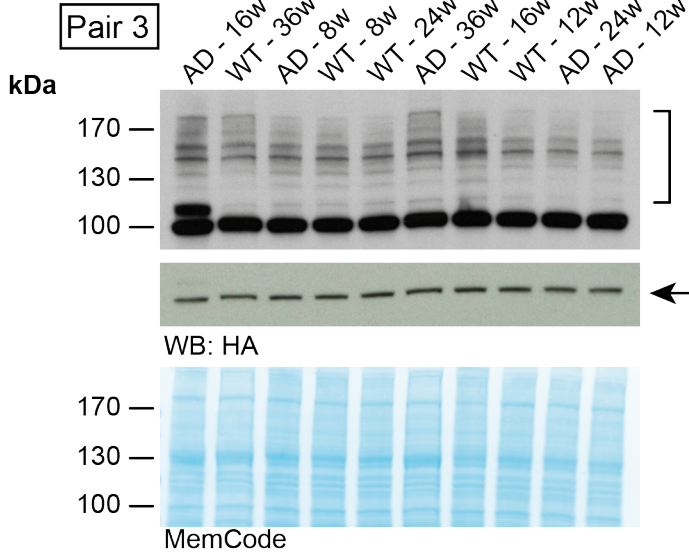

**Pair 4**

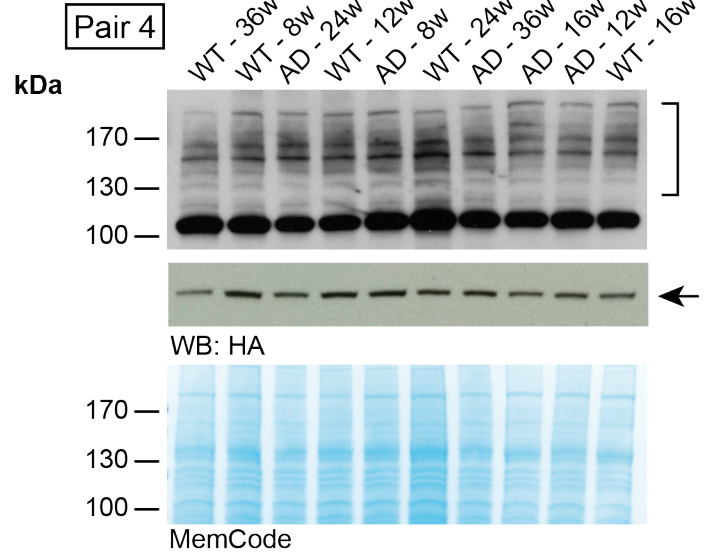

**Pair 5**

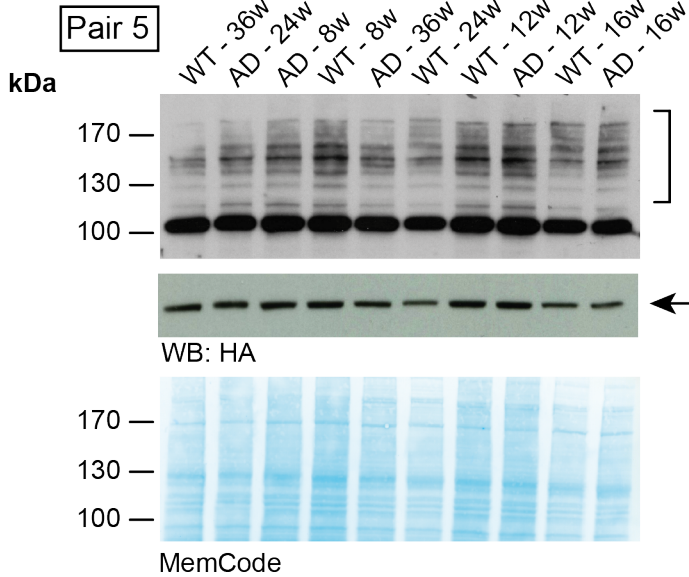

**Pair 6**

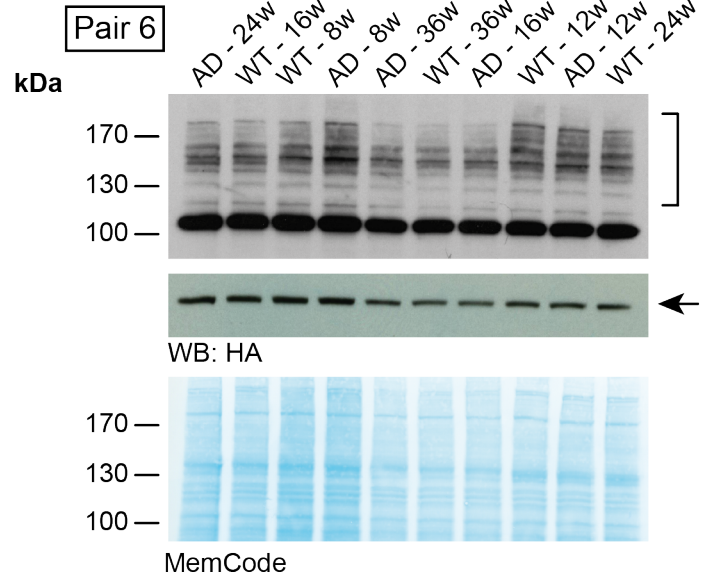

# Cortical Loading III

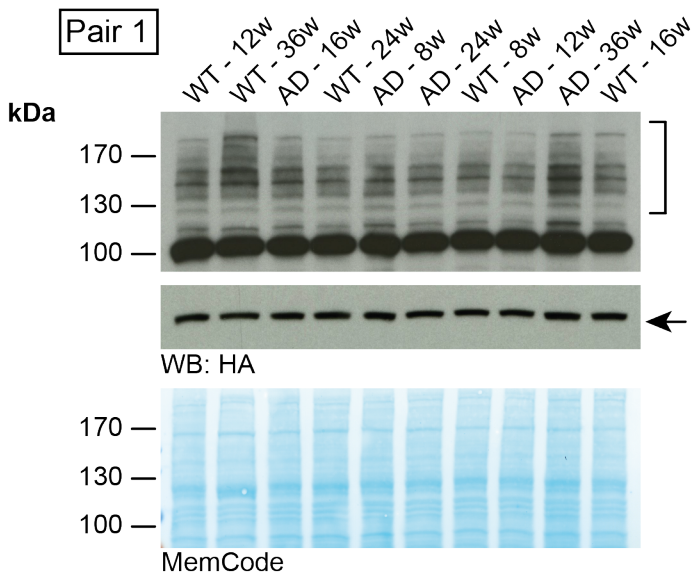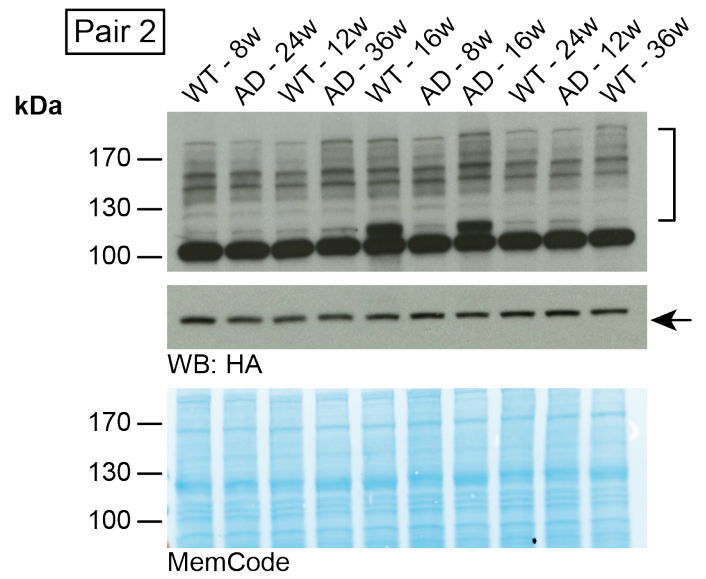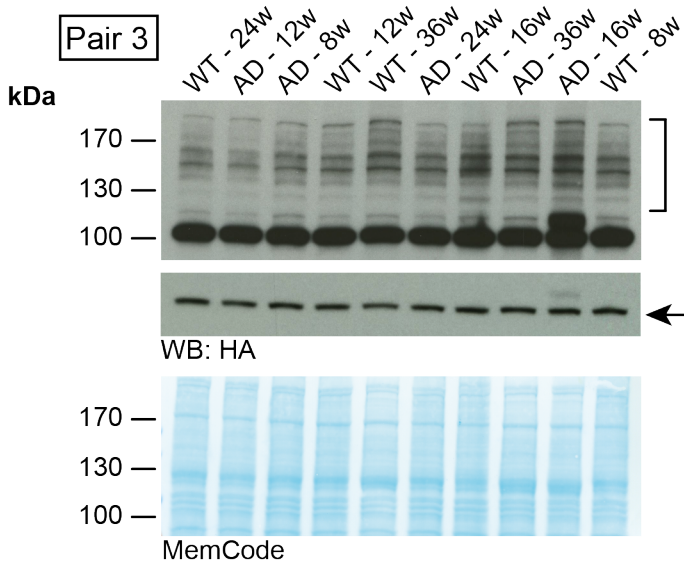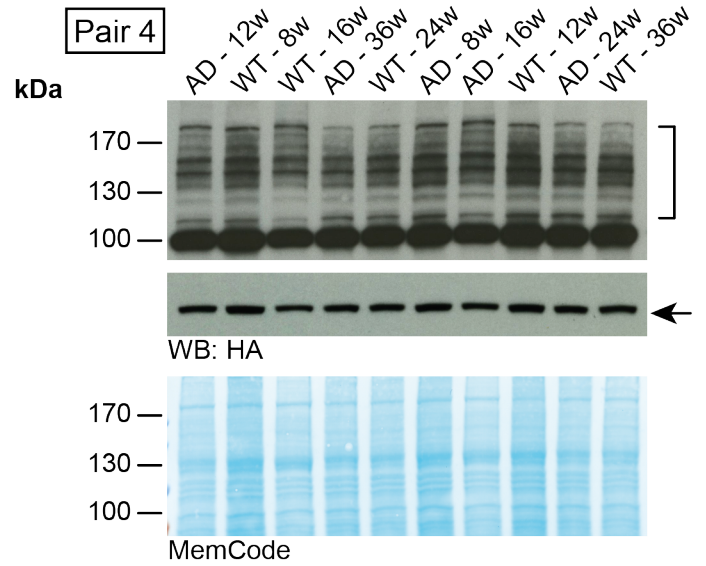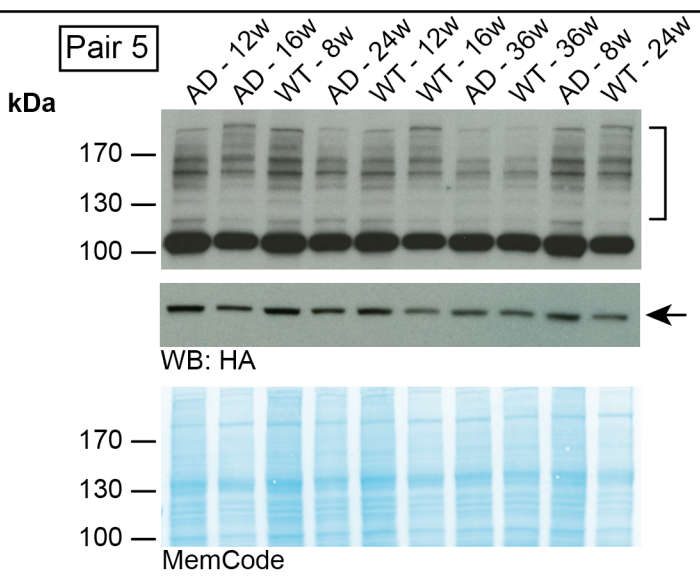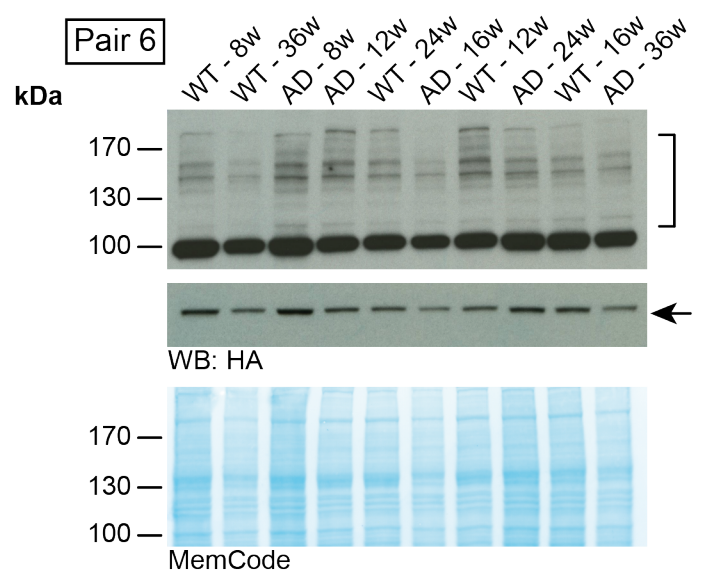

Supplement: ACEL-17-na-s005.pdf [file ACEL-17-na-s005.pdf]
