# Supplementary material for: SUMO1‐conjugation is altered during normal aging but not by increased amyloid burden
Source: PubMed Central journal article supplement (PMC6052395; doi:10.1111/acel.12760), 2018-04-06

# Supplementary Figure 1

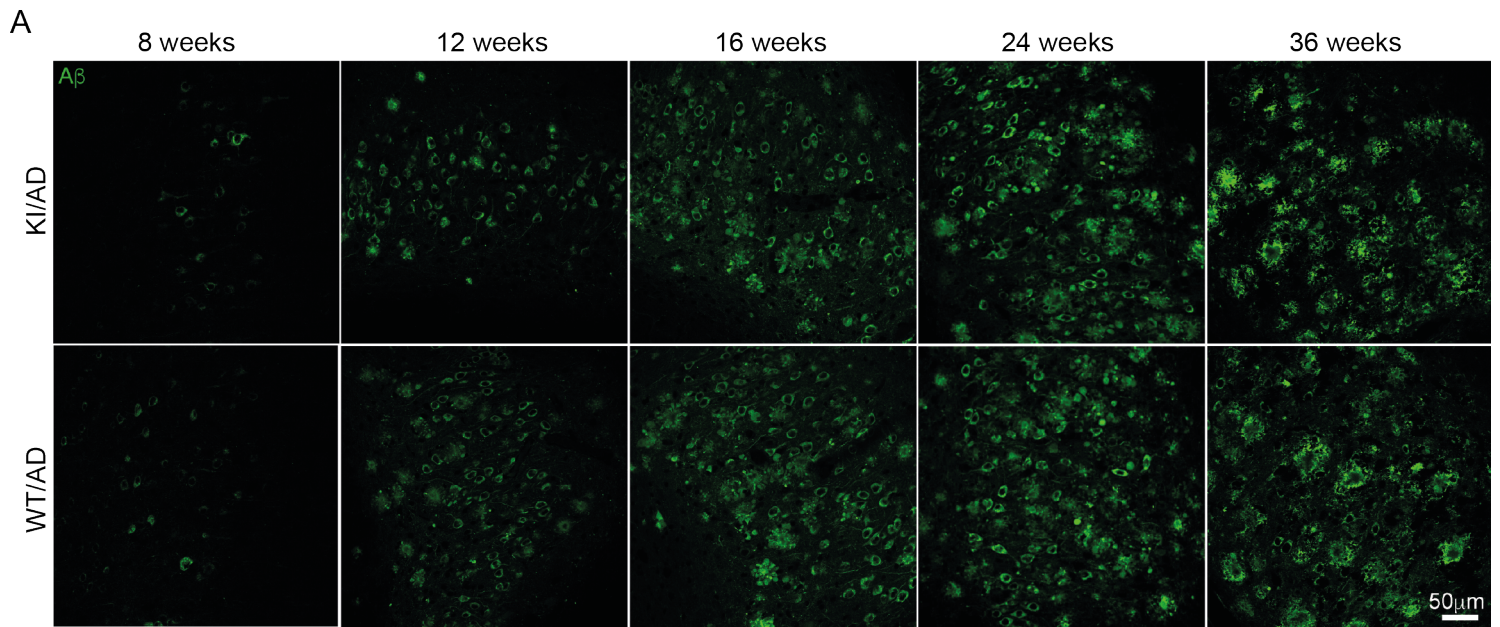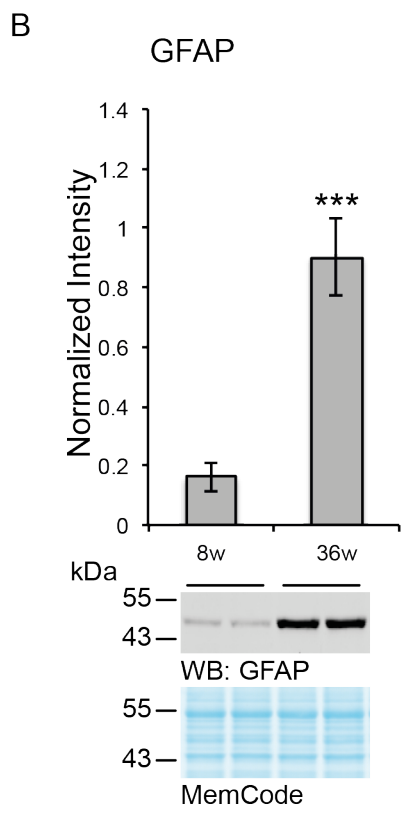

Supplementary Figure 2

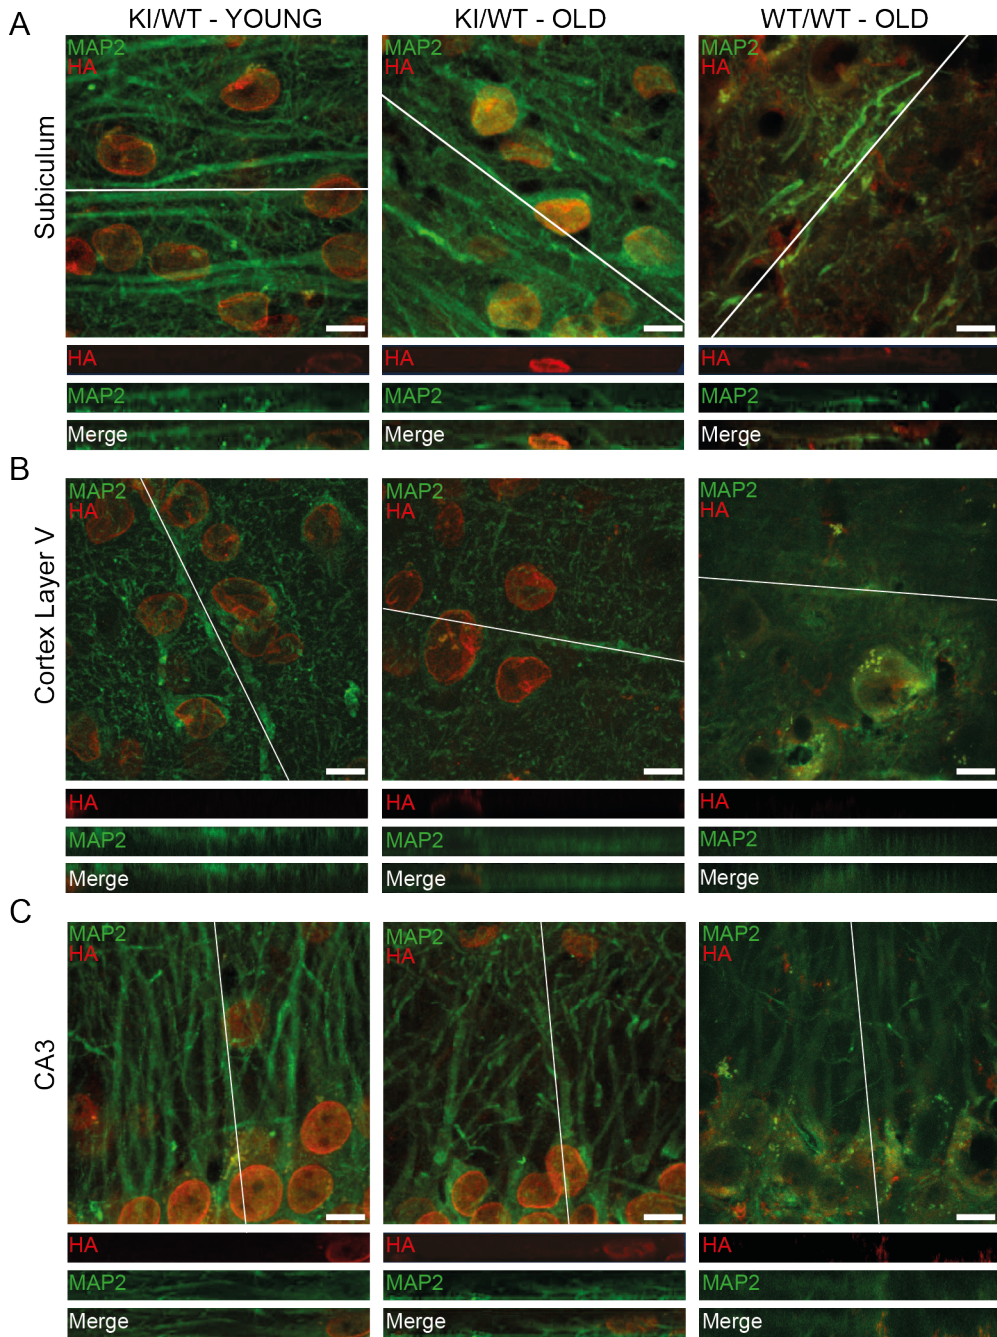

Supplementary Figure 3

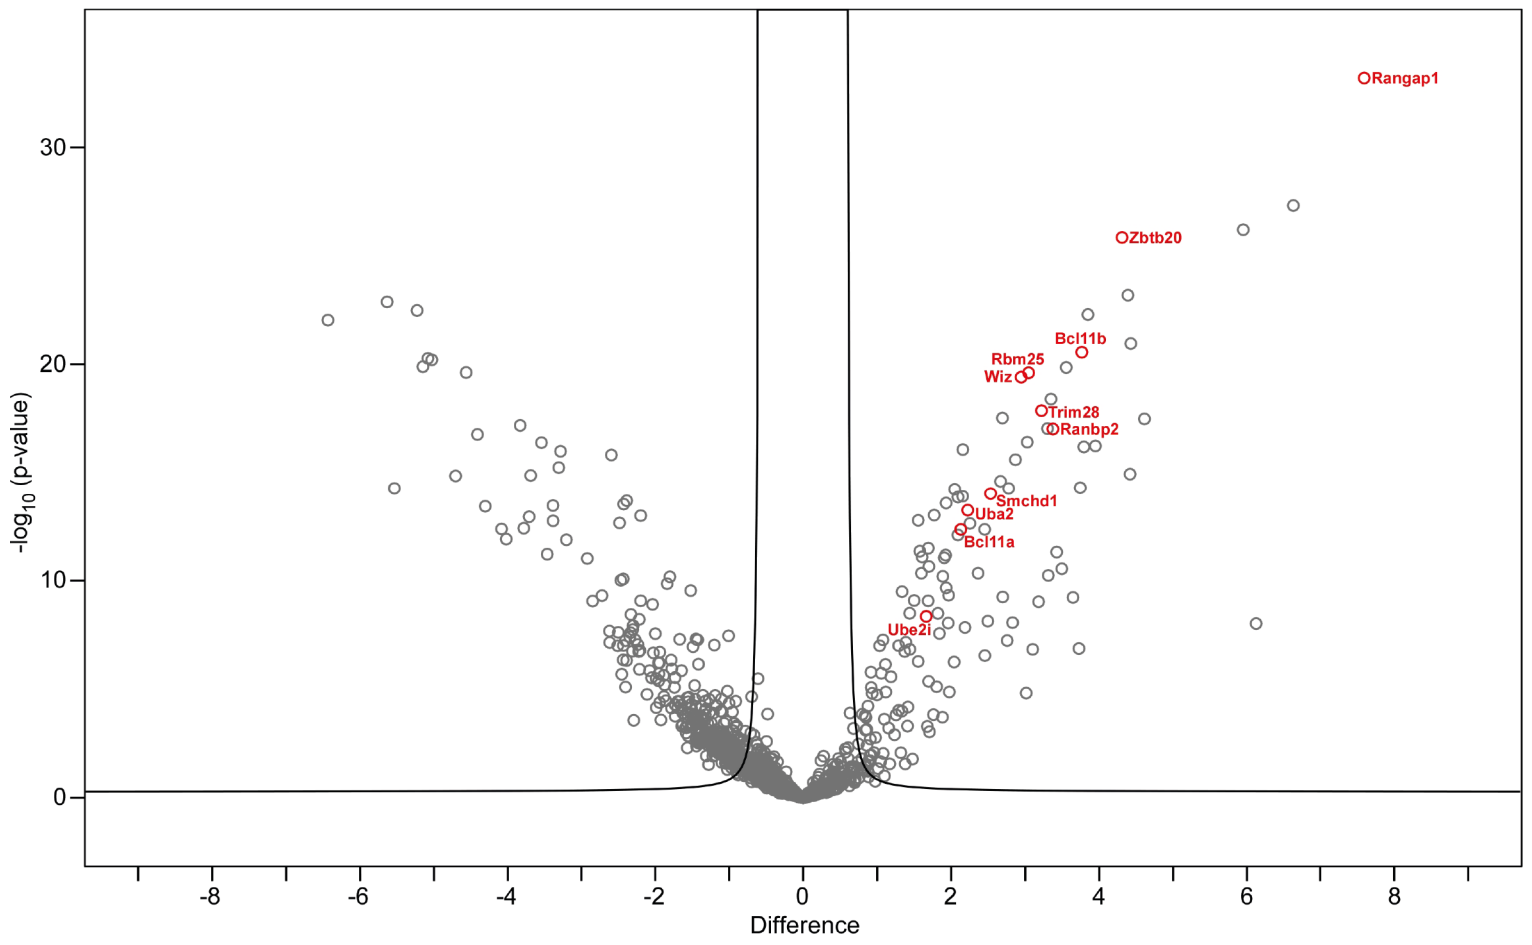

Supplementary Figure 4

A

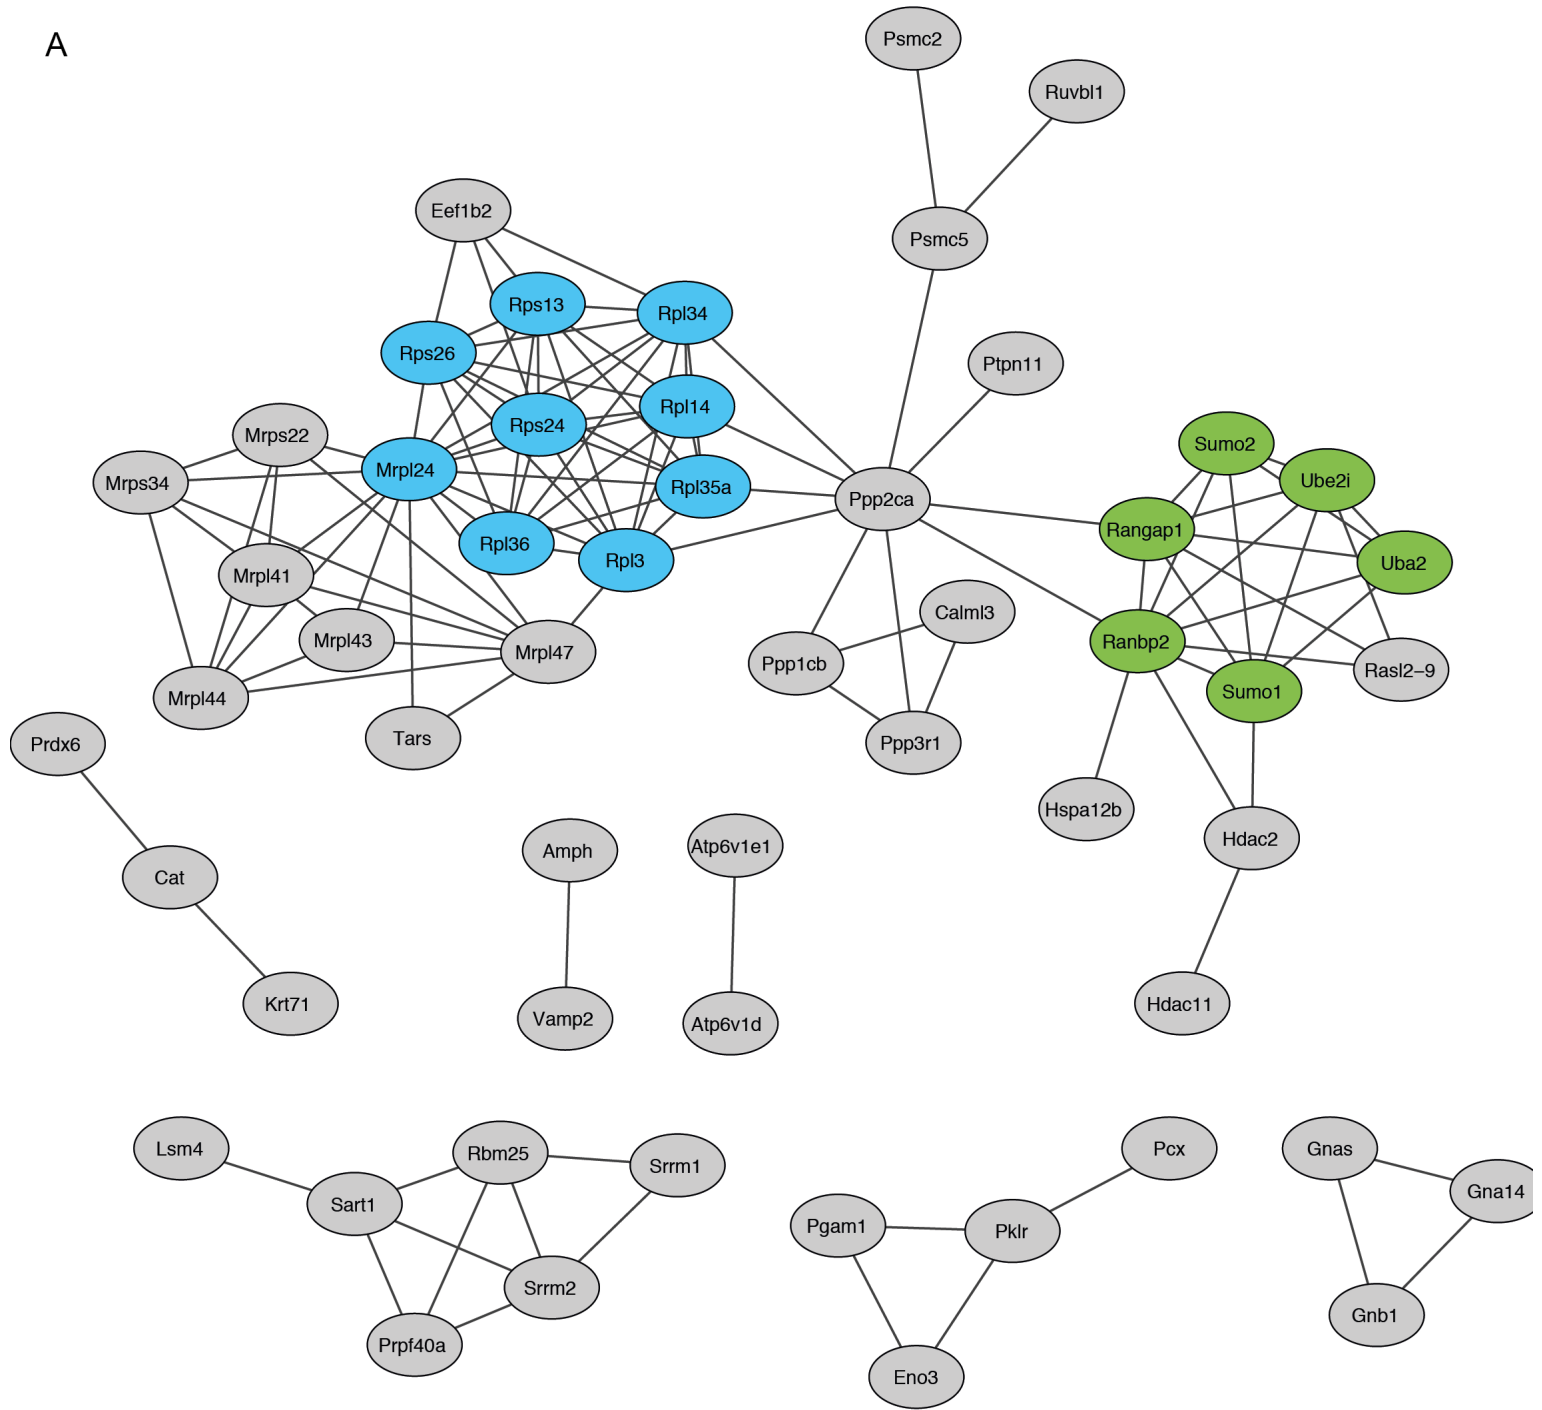

B

Cluster 1: score 9  
(Ribosome)

Cluster 2: score 6  
(SUMOylation pathway)

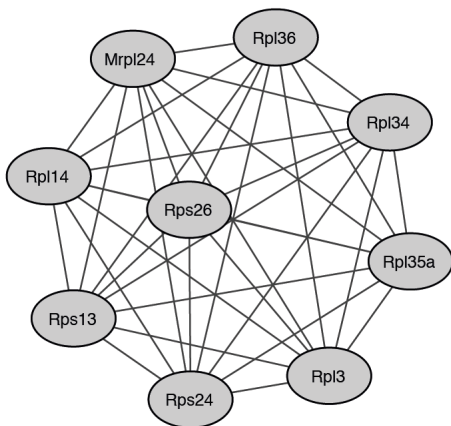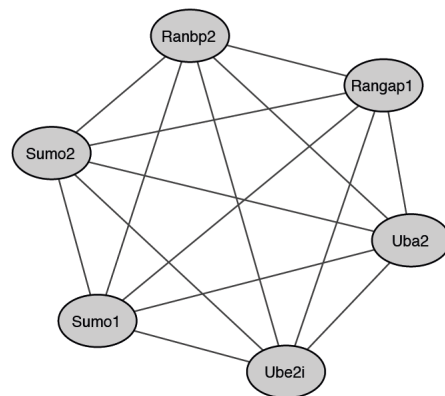

Supplement: ACEL-17-na-s001.pdf [file ACEL-17-na-s001.pdf]
